# Supplementary material for: Elevated atmospheric CO 2 concentration and vegetation structural changes contributed to gross primary productivity increase more than climate and forest cover changes in subtropical forests of China
Source: Copernicus journal article supplement (doi:10.5194/bg-21-2253-2024), 2024-05-07
Supplement: Supplementary file 1 [file bg-21-2253-2024-supplement.pdf]

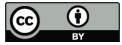

*Supplement of*

**Elevated atmospheric CO<sub>2</sub> concentration and vegetation structural changes contributed to gross primary productivity increase more than climate and forest cover changes in subtropical forests of China**

**Tao Chen et al.**

*Correspondence to:* Guoping Tang (tanggp3@mail.sysu.edu.cn)

The copyright of individual parts of the supplement might differ from the article licence.

## Text S1 (description of the photosynthesis module in the BEPS model)

35 The BEPS model was originally developed at the Canada Centre for Remote Sensing to assist in natural resources management (Liu et al., 1997). Compared with 15 prognostic models that participated in the Global Carbon Project (GCP) (Le Quere et al., 2018), BEPS results are mostly better in terms of the Pearson regression coefficient ( $R^2$ ), root mean square error (RMSE), accumulated total sink, and trend against the residual land sink reported by Le Quere et al (2018). The BEPS model was mainly  
40 driven by remotely sensed datasets, which can be used for simulating the key carbon (e.g., GPP, NPP and NEP) and water (e.g., ET) fluxes of the terrestrial ecosystems at the yearly, daily and hourly scales. In the BEPS model, there are 8 plant functional types (PFTs), including shrubland, grassland, cropland, and four forest types (the evergreen needleleaf forests (ENF), deciduous needleleaf forests (DNF), deciduous broadleaf forests (DBF), evergreen broadleaf forests (EBF), mixed forests (MXF)). For the  
45 detailed structure of the BEPS model, please refer to Xing et al., (2023).

At the daily scale, the BEPS model was driven by the daily leaf area index (LAI), daily meteorological data, etc. Daily carbon fixation in the BEPS model is calculated by scaling Farquhar's leaf biochemical model (Farquhar et al., 1980) up to canopy-level implemented with a spatial and temporal scaling scheme (Chen et al., 1999). Daily gross primary productivity (GPP) is calculated separately for sunlit and shaded  
50 leaves (see Eq. (1-3) and Eq. (S1-S6)). The photosynthesis of sunlit and shaded leaves  $A$  (i.e.,  $A_{sun}$  (unit:  $\mu\text{mol m}^{-2} \text{s}^{-1}$ ) and  $A_{shade}$  (unit:  $\mu\text{mol m}^{-2} \text{s}^{-1}$ )) can be calculated as follows:

$$A = \min(A_c, A_j) - 0.015 \times V_m \quad (\text{S1})$$

where  $A_c$  denotes the Rubisco-limited gross photosynthesis rate ( $\mu\text{mol m}^{-2} \text{s}^{-1}$ ) and is computed as Eq. S2;  $A_j$  is the RuBP-limited gross photosynthesis rate ( $\mu\text{mol m}^{-2} \text{s}^{-1}$ ) and is calculated as Eq. S3.

$$A_c = V_m \frac{C_i - \Gamma}{C_i + K} \quad (\text{S2})$$

$$A_j = J \frac{C_i - \Gamma}{4.5C_i + 10.5\Gamma} \quad (\text{S3})$$

where  $C_i$  is the intercellular  $\text{CO}_2$  (Pa);  $K$  is a function of enzyme kinetics (Pa) and is calculated as  $K = K_C \times \left(1 + \frac{O_2}{K_O}\right)$ ;  $O_2$  is oxygen concentrations in the atmosphere (Pa);  $K_C$  and  $K_O$  are the Michaelis-Menten constants for  $\text{CO}_2$  (Pa) and  $\text{O}_2$  (Pa), respectively;  $\Gamma$  denotes the  $\text{CO}_2$  compensation point without dark respiration (Pa) and is calculated as  $\Gamma = 4.04 \times 1.75^{(T_a - 25)/10}$ ;  $V_{cmax}$  is the maximum carboxylation rate ( $\mu\text{mol m}^{-2} \text{s}^{-1}$ ) and  $J$  represents the electron transport rate ( $\mu\text{mol m}^{-2} \text{s}^{-1}$ ). The corresponding formulas for  $V_m$  and  $J$  are as follows:  
55

$$V_m = V_{cmax25} \times 2.4 \frac{T_a - 25}{10} f(T_a) f(N) \quad (\text{S4})$$

$$f(T_a) = \left\{ 1 + \exp \left[ \frac{-220000 + 710 \times (T_a + 273)}{8.314 \times (T_a + 273)} \right] \right\}^{-1} \quad (\text{S5})$$

$$J = (29.1 + 1.64V_m) \times PPF D / (PPFD + 2.1 \times (29.1 + 1.64V_m)) \quad (\text{S6})$$

60 where  $V_{cmax25}$  is the maximum carboxylation rate at  $25^\circ\text{C}$  ( $\mu\text{mol m}^{-2} \text{s}^{-1}$ );  $T_a$  is air temperature ( $^\circ\text{C}$ );  $f(N)$  is the function of nitrogen (N) and is usually set to 0.5 in the BEPS model (Liu et al., 1999; Zhang

et al., 2018), which can adjust the photosynthesis rate for foliage nitrogen (Bonan, 1995). The *PPFD* is the photosynthesis photon flux density ( $\mu\text{mol m}^{-2} \text{s}^{-1}$ ).

65 When BEPS modelled the dynamics of carbon pools beyond the GPP, it stratified soil carbon stocks into 9 pools (i.e., surface structural litter, surface metabolic litter, soil structural litter, soil metabolic litter, coarse woody litter, surface microbe, soil microbe, slow, and passive carbon pools). These 9 carbon pools were used to calculate heterotrophic respiration ( $R_h$ ) and autotrophic respiration ( $R_a$ ). Eventually, the net ecosystem productivity (NEP) is calculated as the difference between GPP and  $R_h$  and  $R_a$ .

$$NEP = GPP - R_h - R_a \quad (S7)$$

70

**Table S1** Information description of flux tower sites in subtropical forest ecosystems in China.

| Site name         | Vegetation type                                  | Longitude | Latitude | Time range | Reference                          |
|-------------------|--------------------------------------------------|-----------|----------|------------|------------------------------------|
| Ailaoshan (ALS)   | Subtropical evergreen broad-leaved forest (EBF)  | 101.029°E | 24.538°N | 2009–2013  | Qi et al. (2020); Yu et al. (2006) |
| Dinghushan (DHS)  | Subtropical evergreen broad-leaved forest (EBF)  | 112.534°E | 23.174°N | 2003–2010  | Yu et al. (2006)                   |
| Qianyanzhou (QYZ) | Subtropical evergreen needle-leaved forest (ENF) | 115.067°E | 26.733°N | 2003–2010  | Yu et al. (2006)                   |

75

80

85

90

95

100

105 **Table S2** The mean ( $\pm$  standard deviation) of  $V_{cmax25}$  for different plant functional types (PFTs) calculated from the remote sensing-derived  $V_{cmax25}$  products (i.e., multi-year average) in China's subtropical forest ecosystems.

| PFTs         | Unit                    | EBF               | DBF              | ENF              | MXF              |
|--------------|-------------------------|-------------------|------------------|------------------|------------------|
| $V_{cmax25}$ | $\mu mol m^{-2} s^{-1}$ | $38.55 \pm 10.14$ | $35.70 \pm 6.22$ | $38.47 \pm 8.32$ | $33.36 \pm 7.96$ |

110

115

120

125

130

135

**Table S3** Details of the published GPP products were used for model comparison.

| Dataset               | Time Range | Spatial Resolution | Description                                                                                                                                                                                                                                                | Source                                                                                                                                                      | References                           |
|-----------------------|------------|--------------------|------------------------------------------------------------------------------------------------------------------------------------------------------------------------------------------------------------------------------------------------------------|-------------------------------------------------------------------------------------------------------------------------------------------------------------|--------------------------------------|
| MODIS GPP             | 2000-2022  | 500 m              | MODIS GPP products are generated by the MOD17 algorithm and Biome-Property-Look-Up-Table by integrating the Terra/Aqua satellite observations (i.e., MODIS surface reflectances, MOD09) and meteorological data                                            | <a href="https://ladsweb.modaps.eosdis.nasa.gov/archive/allData/6/MOD17A2H/">https://ladsweb.modaps.eosdis.nasa.gov/archive/allData/6/MOD17A2H/</a>         | Running et al. (2015)                |
| EC-LUE GPP            | 1982–2018  | 0.05°              | EC-LUE GPP data are derived from the Eddy Covariance-Light Use Efficiency model by integrating several major long-term environmental variables (e.g., air temperature, leaf area index, and atmospheric water vapor pressure)                              | <a href="https://doi.org/10.6084/m9.figshare.8942336.v3">https://doi.org/10.6084/m9.figshare.8942336.v3</a> .                                               | Zheng et al. (2020)                  |
| NIRv GPP              | 1982–2018  | 0.05°              | NIRv GPP data are generated by combining the long-term satellite observations of AVHRR reflectance from LTDR (Land Long Term Data Record v4) product and global flux sites with the machine-learning algorithm                                             | <a href="https://doi.org/10.6084/m9.figshare.12981977.v2">https://doi.org/10.6084/m9.figshare.12981977.v2</a> .                                             | Wang et al. (2021)                   |
| VPM GPP               | 2000-2016  | 0.05°              | VPM GPP products are based on an improved light use efficiency model and are driven by satellite data from MODIS (e.g., MCD12Q1, MYD11A2 and MOD09A1) and climate data from NCEP Reanalysis II                                                             | <a href="https://figshare.com/articles/dataset/Annual_GPP_at_0_5_degree/5048005">https://figshare.com/articles/dataset/Annual_GPP_at_0_5_degree/5048005</a> | Zhang et al. (2017)                  |
| BEPS <sub>g</sub> GPP | 1982–2019  | 0.072727°          | BEPS <sub>g</sub> GPP products are generated by the process-based Boreal Ecosystem Productivity Simulator model with global calibrated parameters and are driven by remotely sensed LAI, meteorological data (e.g., CRUNCEP V8.0 dataset), soil data, etc. | <a href="http://www.nesdc.org.cn/sdo/detail?id=612f42ee7e28172cbcd3d809">http://www.nesdc.org.cn/sdo/detail?id=612f42ee7e28172cbcd3d809</a>                 | Chen et al. (2019); He et al. (2021) |

**Table S4** Comparison of simulated daily GPP vs. observed daily GPP<sub>EC</sub> for all three sites in each year.

| Sites | Time period | R <sup>2</sup> | RMSE (g C m <sup>-2</sup> day <sup>-1</sup> ) | MBE (g C m <sup>-2</sup> day <sup>-1</sup> ) |
|-------|-------------|----------------|-----------------------------------------------|----------------------------------------------|
| ALS   | 2009        | 0.50           | 1.69                                          | -0.01                                        |
|       | 2010        | 0.72           | 1.56                                          | -0.10                                        |
|       | 2011        | 0.66           | 1.49                                          | -0.11                                        |
|       | 2012        | 0.53           | 1.50                                          | -0.14                                        |
|       | 2013        | 0.53           | 1.57                                          | 0.17                                         |
|       | Overall     |                | 0.58                                          | 1.57                                         |
| DHS   | 2003        | 0.44           | 1.09                                          | 0.38                                         |
|       | 2004        | 0.58           | 0.95                                          | -0.01                                        |
|       | 2005        | 0.65           | 1.24                                          | 0.88                                         |
|       | 2006        | 0.49           | 1.21                                          | 0.44                                         |
|       | 2007        | 0.47           | 1.16                                          | 0.01                                         |
|       | 2008        | 0.43           | 1.20                                          | -0.22                                        |
|       | 2009        | 0.43           | 1.21                                          | 0.48                                         |
|       | 2010        | 0.49           | 1.05                                          | 0.01                                         |
|       | Overall     |                | 0.44                                          | 1.17                                         |
| QYZ   | 2003        | 0.77           | 1.27                                          | -0.40                                        |
|       | 2004        | 0.85           | 1.12                                          | 0.18                                         |
|       | 2005        | 0.84           | 1.06                                          | 0.03                                         |
|       | 2006        | 0.78           | 1.42                                          | -0.00                                        |
|       | 2007        | 0.71           | 1.46                                          | -0.62                                        |
|       | 2008        | 0.79           | 1.34                                          | -0.38                                        |
|       | 2009        | 0.76           | 1.40                                          | -0.40                                        |
|       | 2010        | 0.70           | 1.60                                          | -0.64                                        |
|       | Overall     |                | 0.77                                          | 1.36                                         |

140

145

150

**Table S5** Comparison of simulated daily NEP vs. observed daily NEP for all three sites in each year.

| Sites | Time period | R <sup>2</sup> | RMSE (g C m <sup>-2</sup> day <sup>-1</sup> ) | MBE (g C m <sup>-2</sup> day <sup>-1</sup> ) |
|-------|-------------|----------------|-----------------------------------------------|----------------------------------------------|
| ALS   | 2009        | 0.21           | 1.69                                          | 0.01                                         |
|       | 2010        | 0.20           | 1.54                                          | 0.04                                         |
|       | 2011        | 0.21           | 1.49                                          | -0.07                                        |
|       | 2012        | 0.37           | 1.21                                          | -0.10                                        |
|       | 2013        | 0.24           | 1.29                                          | 0.27                                         |
|       | Overall     |                | 0.25                                          | 1.46                                         |
| DHS   | 2003        | 0.41           | 1.08                                          | 0.37                                         |
|       | 2004        | 0.45           | 0.95                                          | -0.01                                        |
|       | 2005        | 0.42           | 1.25                                          | 0.86                                         |
|       | 2006        | 0.38           | 1.21                                          | 0.42                                         |
|       | 2007        | 0.26           | 1.16                                          | -0.01                                        |
|       | 2008        | 0.26           | 1.20                                          | -0.18                                        |
|       | 2009        | 0.49           | 1.21                                          | 0.54                                         |
|       | 2010        | 0.38           | 1.05                                          | 0.01                                         |
|       | Overall     |                | 0.35                                          | 1.14                                         |
| QYZ   | 2003        | 0.33           | 1.27                                          | 0.04                                         |
|       | 2004        | 0.57           | 1.12                                          | 0.17                                         |
|       | 2005        | 0.54           | 1.06                                          | 0.03                                         |
|       | 2006        | 0.48           | 1.42                                          | 0.07                                         |
|       | 2007        | 0.36           | 1.46                                          | -0.04                                        |
|       | 2008        | 0.46           | 1.31                                          | 0.12                                         |
|       | 2009        | 0.36           | 1.40                                          | 0.04                                         |
|       | 2010        | 0.27           | 1.60                                          | -0.09                                        |
|       | Overall     |                | 0.42                                          | 1.34                                         |

155

160



**Table S6** Sites information of the measured net primary productivity (NPP) data used in this study

| ID | Longitude | Latitude | Measured NPP (g C/m <sup>2</sup> /year) | References         |
|----|-----------|----------|-----------------------------------------|--------------------|
| 1  | 112.53    | 23.17    | 395.95                                  | Yang et al., 2017  |
| 2  | 101.02    | 24.53    | 976.15                                  | Tan et al., 2011   |
| 3  | 115.05    | 26.73    | 487.51                                  | Yang et al., 2017  |
| 4  | 109.75    | 26.83    | 313.40                                  | Zhang, 2010        |
| 5  | 112.86    | 29.53    | 515.65                                  | Han, 2008          |
| 6  | 116.99    | 30.47    | 506.10                                  | Han, 2008          |
| 7  | 113.91    | 33.35    | 343.40                                  | Geng, 2011         |
| 8  | 109.445   | 28.405   | 640.15                                  | Fan et al., 2011,  |
| 9  | 109.445   | 28.405   | 591.25                                  | Fang et al., 2003  |
| 10 | 109.445   | 28.405   | 742.39                                  | Fang et al., 2002  |
| 11 | 110.515   | 27.505   | 484.55                                  | Lan et al., 2004   |
| 12 | 106.985   | 26.455   | 626.81                                  | Li et al., 2007    |
| 13 | 106.985   | 26.455   | 471.22                                  | Li et al., 2008    |
| 14 | 106.985   | 26.455   | 493.45                                  | Liang et al., 2007 |
| 15 | 106.985   | 26.455   | 626.81                                  | Liu et al., 2007   |
| 16 | 106.985   | 26.455   | 529.01                                  | Liu et al., 2007   |
| 17 | 109.675   | 23.755   | 382.31                                  | Luo et al., 2011   |
| 18 | 109.675   | 23.755   | 426.76                                  | Luo et al., 2011   |
| 19 | 109.785   | 26.915   | 222.27                                  | Luo et al., 2011   |
| 20 | 108.355   | 22.975   | 448.99                                  | Qi et al., 2007    |
| 21 | 109.835   | 22.625   | 1138.04                                 | Qin et al., 2011   |
| 22 | 100.855   | 23.205   | 1200.27                                 | Xia et al., 2010   |
| 23 | 100.855   | 23.205   | 1066.90                                 | Xia et al., 2010   |
| 24 | 99.455    | 24.335   | 1089.14                                 | Xia et al., 2010   |
| 25 | 99.455    | 24.335   | 817.96                                  | Xiong et al., 2006 |
| 26 | 107.965   | 25.305   | 635.70                                  | Yang et al., 2008  |
| 27 | 107.955   | 25.305   | 569.02                                  | Yang et al., 2001  |
| 28 | 111.885   | 23.455   | 764.62                                  | Yang et al., 2003  |
| 29 | 111.885   | 23.455   | 831.30                                  | Yang et al., 2003  |
| 30 | 108.355   | 22.975   | 422.32                                  | Ye et al., 2010    |
| 31 | 108.355   | 22.975   | 711.27                                  | Ye et al., 2010    |
| 32 | 108.355   | 22.975   | 733.50                                  | Ye et al., 2010    |
| 33 | 112.535   | 23.175   | 915.76                                  | Yin et al., 2010   |

165

170

175 **Table S7** Land-cover change transition matrix for the 2001–2018 period in the subtropical region of China. EBF: evergreen needle-leaved forest; DBF: deciduous broad-leaved forest; ENF: evergreen needle-leaved forest; MF: mixed forest; CRO: cropland; GRA: grassland; SHR: shrubland; URB: urban; and BAR: bare land. Green and red arrows indicate a net increase and a net decrease, respectively.

|                                        |               | 2018 ( $\times 10^3$ km <sup>2</sup> ) |                |               |                |               |                |               |               |       | Total   | Losses |
|----------------------------------------|---------------|----------------------------------------|----------------|---------------|----------------|---------------|----------------|---------------|---------------|-------|---------|--------|
|                                        |               | EBF                                    | DBF            | ENF           | MXF            | CRO           | GRA            | SHR           | URB           | BAR   |         |        |
| 2001 ( $\times 10^3$ km <sup>2</sup> ) | <b>EBF</b>    | 551.08                                 | 0.38           | 1.72          | 7.79           | 3.03          | 0.13           | 0.42          | 0.00          | 0.10  | 564.66  | 13.57  |
|                                        | <b>DBF</b>    | 0.64                                   | 89.62          | 0.16          | 2.97           | 0.26          | 0.03           | 0.03          | 0.03          | 0.00  | 93.74   | 4.12   |
|                                        | <b>ENF</b>    | 3.48                                   | 0.06           | 492.41        | 19.04          | 13.10         | 0.80           | 0.32          | 0.29          | 0.03  | 529.52  | 37.11  |
|                                        | <b>MXF</b>    | 8.50                                   | 1.12           | 10.73         | 275.61         | 3.00          | 0.48           | 0.13          | 1.72          | 0.16  | 301.44  | 25.84  |
|                                        | <b>CRO</b>    | 12.33                                  | 2.14           | 4.18          | 4.63           | 1089.49       | 0.80           | 0.64          | 34.75         | 1.53  | 1150.49 | 61.00  |
|                                        | <b>GRA</b>    | 0.29                                   | 0.10           | 1.57          | 1.98           | 0.67          | 127.85         | 0.00          | 4.95          | 0.10  | 137.50  | 9.65   |
|                                        | <b>SHR</b>    | 5.59                                   | 0.67           | 2.17          | 1.02           | 3.39          | 0.10           | 9.58          | 0.22          | 0.10  | 22.84   | 13.25  |
|                                        | <b>URB</b>    | 0.00                                   | 0.00           | 0.00          | 0.00           | 0.03          | 0.00           | 0.00          | 23.76         | 0.00  | 23.79   | 0.03   |
|                                        | <b>BAR</b>    | 0.10                                   | 0.03           | 0.00          | 0.06           | 0.67          | 0.10           | 0.83          | 0.93          | 56.18 | 58.90   | 2.71   |
|                                        | <b>Total</b>  | 582.00                                 | 94.13          | 512.95        | 313.10         | 1113.63       | 130.28         | 11.95         | 66.66         | 58.19 | –       | –      |
| <b>Gains</b>                           | 30.92         | 4.50                                   | 20.54          | 37.50         | 24.15          | 2.43          | 2.36           | 42.89         | 2.01          | –     | –       |        |
| <b>Net changes</b>                     | <b>17.34↑</b> | <b>0.38↑</b>                           | <b>-16.58↓</b> | <b>11.66↑</b> | <b>-36.86↓</b> | <b>-7.22↓</b> | <b>-10.89↓</b> | <b>42.86↑</b> | <b>-0.70↓</b> | –     | –       |        |

180

185

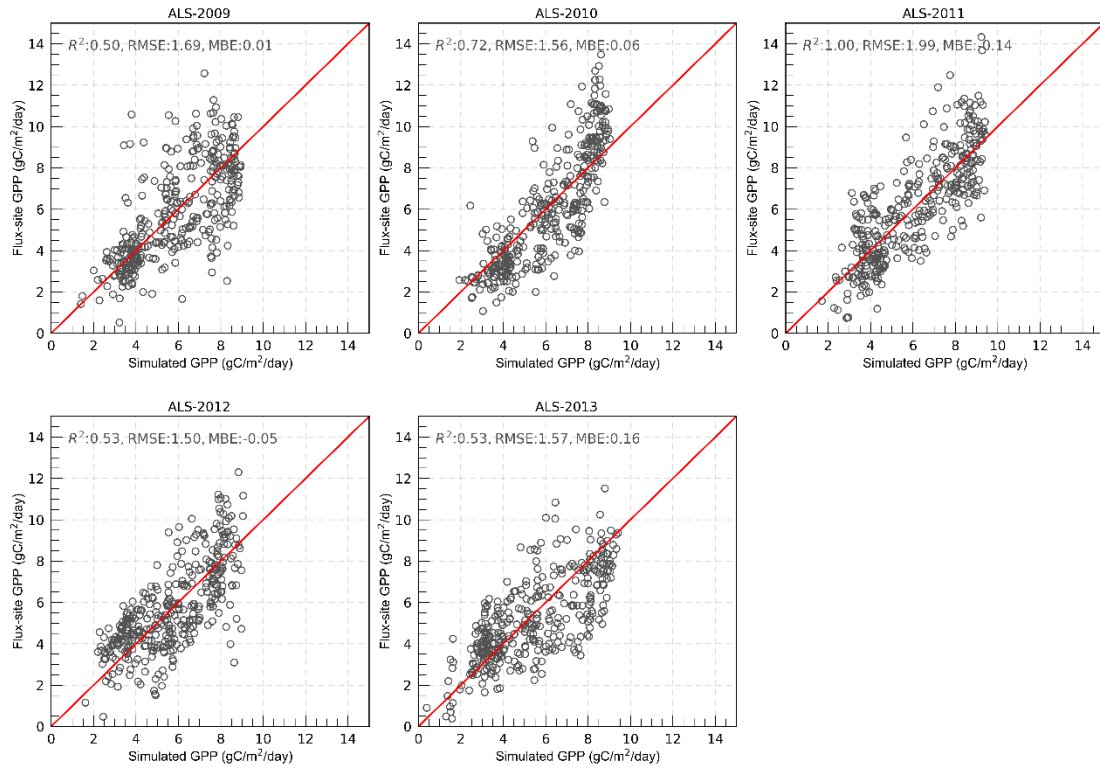

190 **Figure S1** Scatter plots show the year-to-year (2009-2013) comparison between the simulated and observed daily GPP in the Ailao Shan flux tower station (ALS). The red line denotes the 1:1 line.

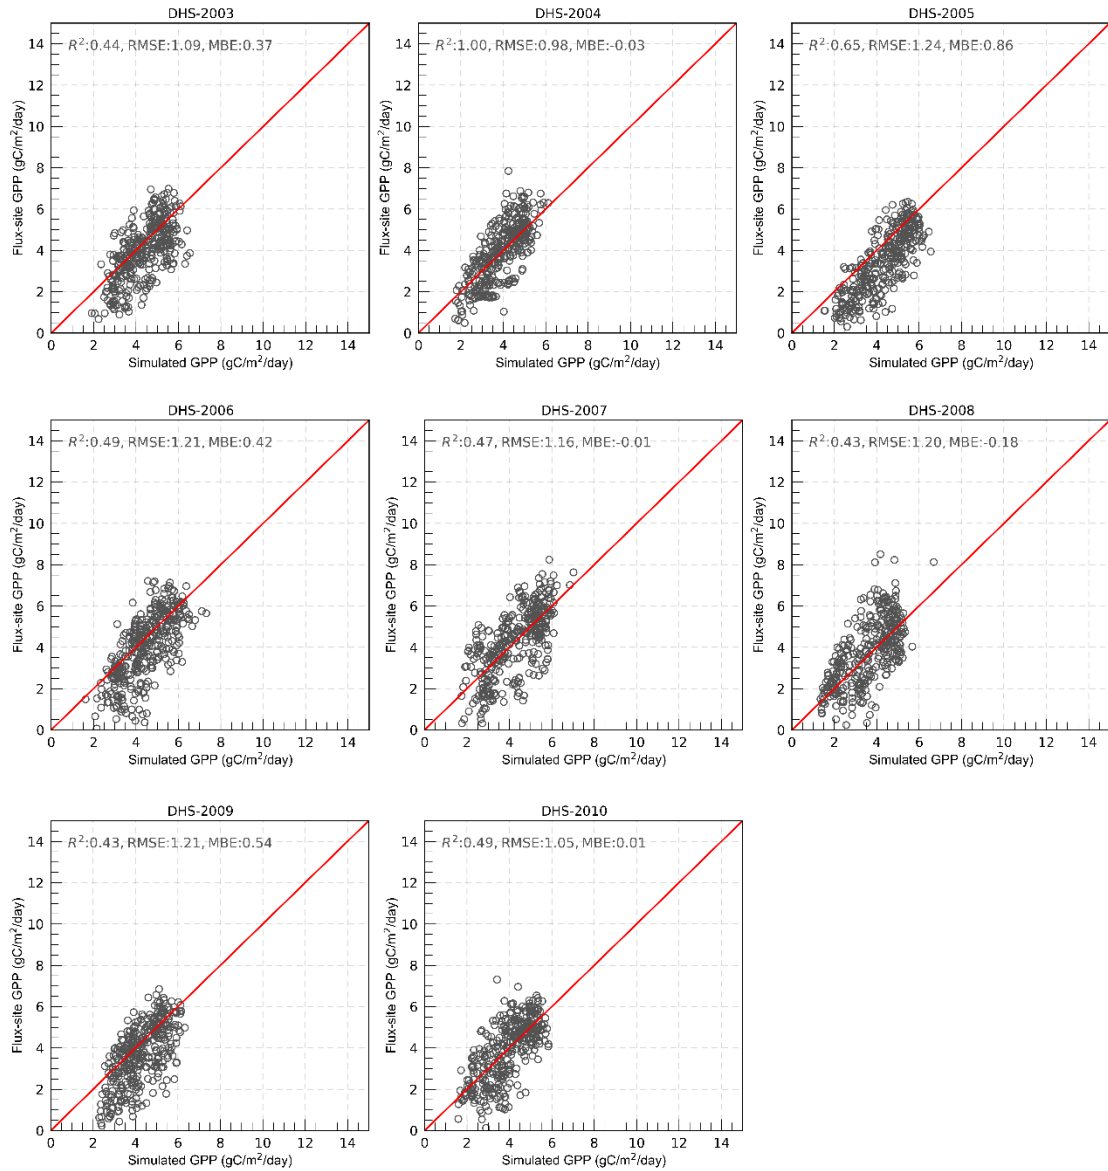

195 **Figure S2** Scatter plots show the year-to-year (2003-2010) comparison between the daily simulated GPP with observed GPP in Dinghu Shan flux tower station (DHS).

200

205

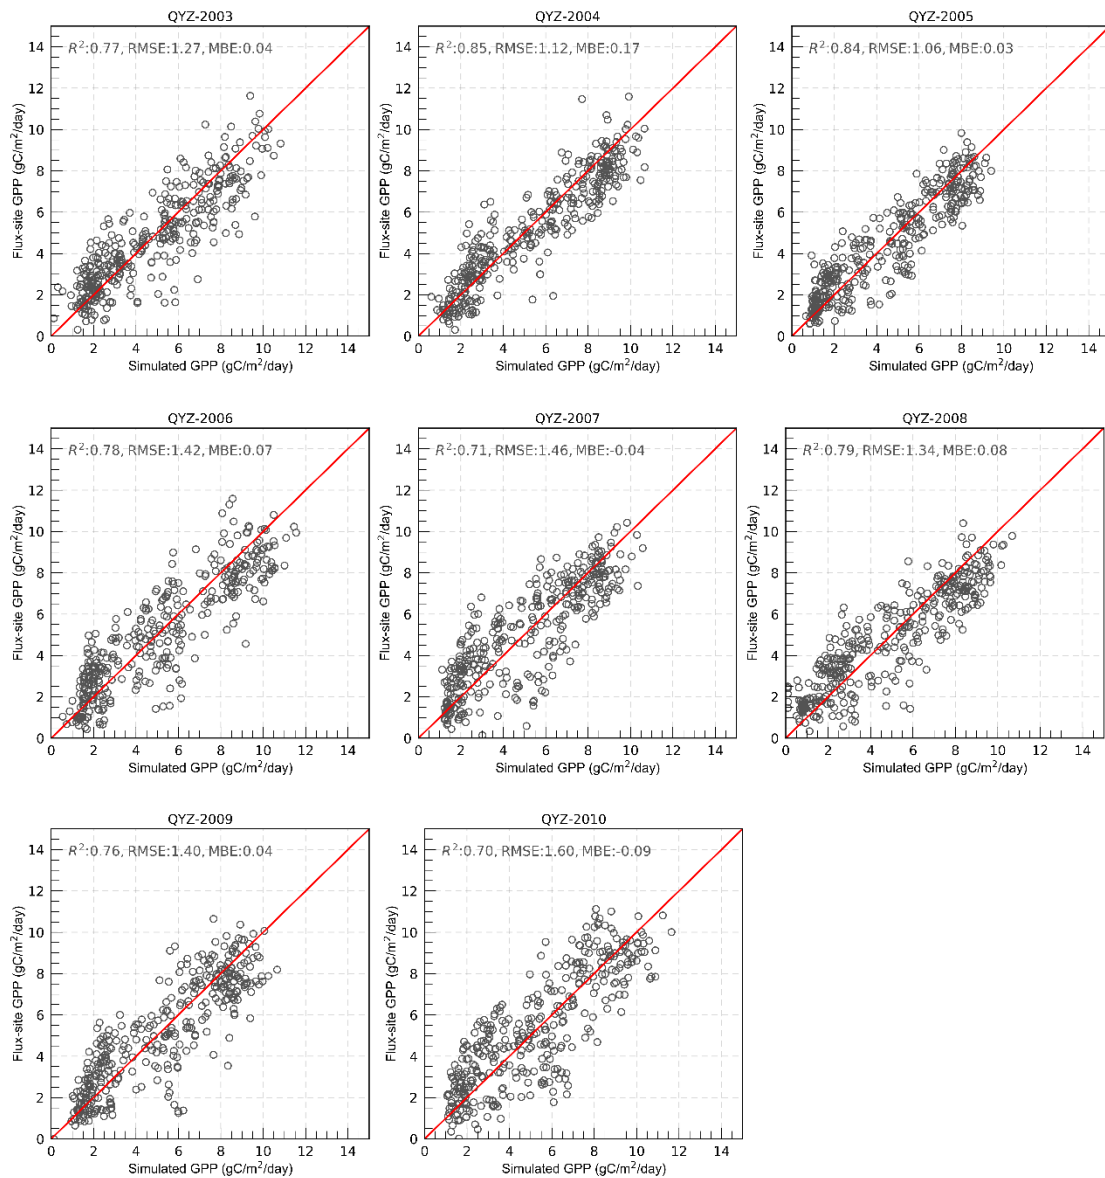

**Figure S3** Scatter plots show the year-to-year (2003-2010) comparison between the daily simulated GPP with observed GPP in Qianyan Zhou flux tower station (QYZ).

210

215

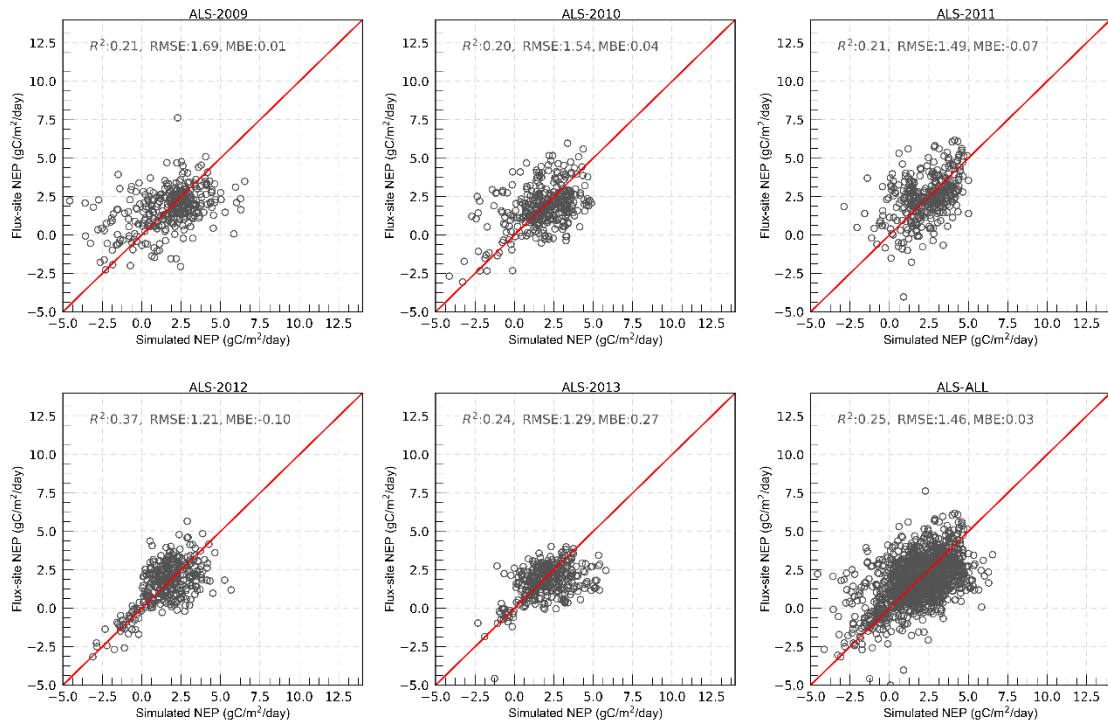

**Figure S4** Scatter plots show the year-to-year (2009-2013) comparison between the daily simulated NEP with observed NEP in the Ailao Shan flux tower station (ALS). The red line denotes the 1:1 line.

225

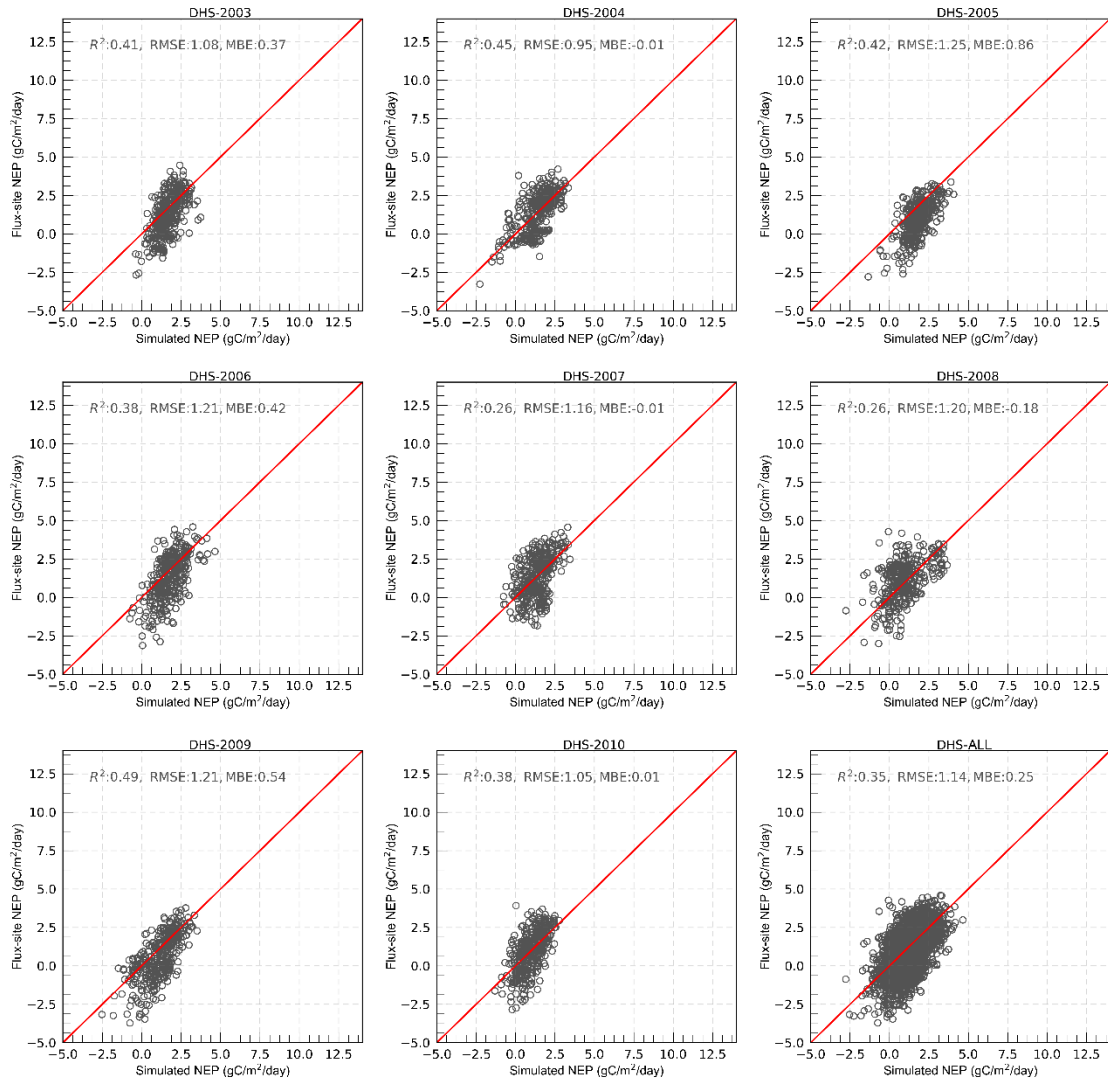

230

**Figure S5** Scatter plots show the year-to-year (2003-2010) comparison between the daily simulated NEP with observed NEP in Dinghu Shan flux tower station (DHS). The red line denotes the 1:1 line.

235

240

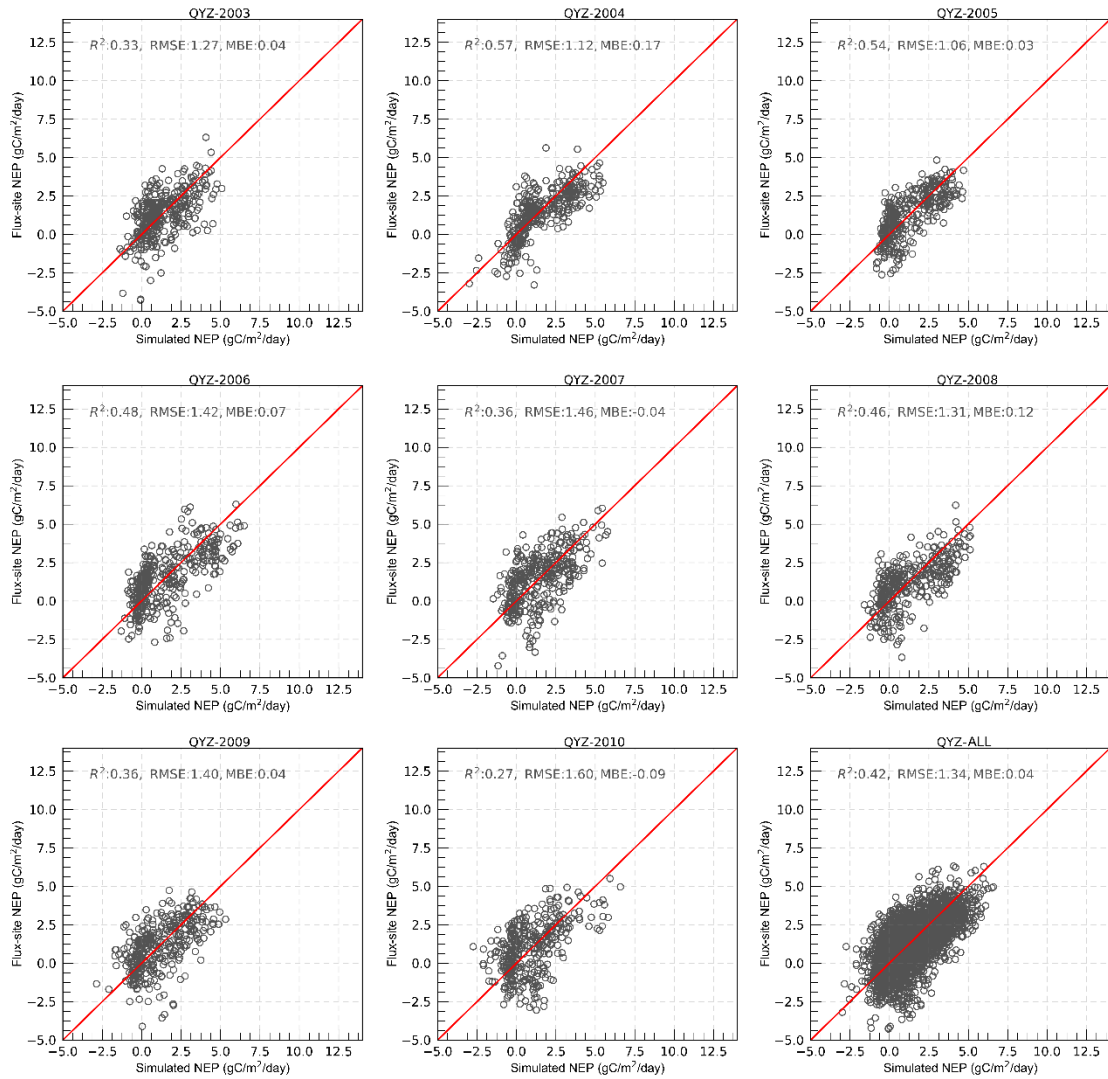

245 **Figure S6** Scatter plots show the year-to-year (2003–2010) comparison between the daily simulated NEP with observed NEP in Qianyan Zhou flux tower station (QYZ). The red line denotes the 1:1 line.

250

255



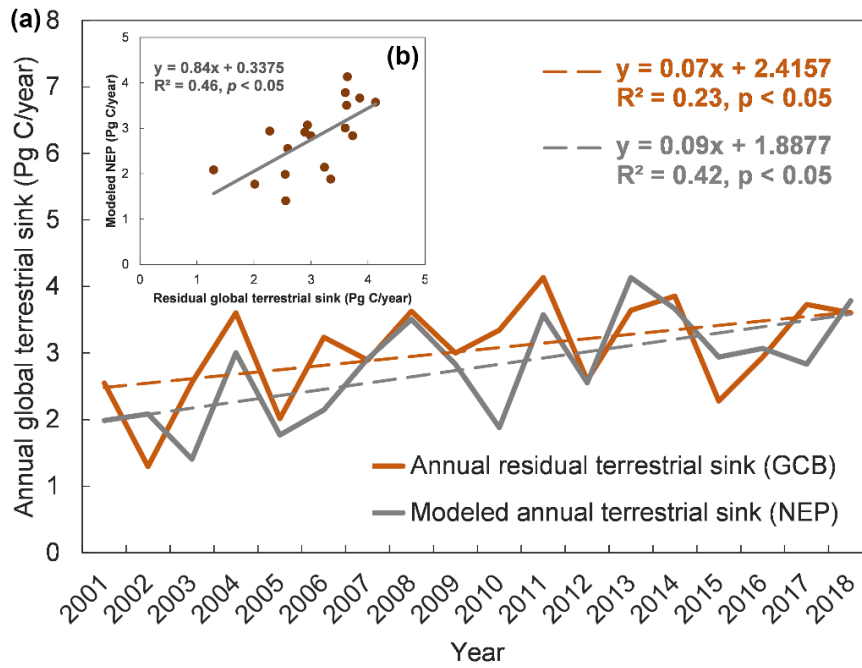

**Figure S7** Comparison of the simulated annual terrestrial sink (NEP) by BEPS model and the residual terrestrial sink estimated by the Global Carbon Project (a). The insert figure represents the correlation between the simulated annual terrestrial sink (NEP) by BEPS model and annual residual terrestrial sink estimated by the Global Carbon Project (b). Here, we obtained the annual terrestrial sink from Global Carbon Budget 2023 provided by the Global Carbon Project (Friedlingstein et al., 2023), and used it for comparison. The annual terrestrial sink is computed as the sum of emissions from fossil fuel consumption, cement production, and land-use change minus the sum of CO<sub>2</sub> accumulated each year in the atmosphere and ocean (i.e., the annual global residual terrestrial sink). Considering that GCB only provides annual global terrestrial CO<sub>2</sub> sink data, we also re-simulated annual global NEP based on BEPS model to make it comparable.

260

265

270

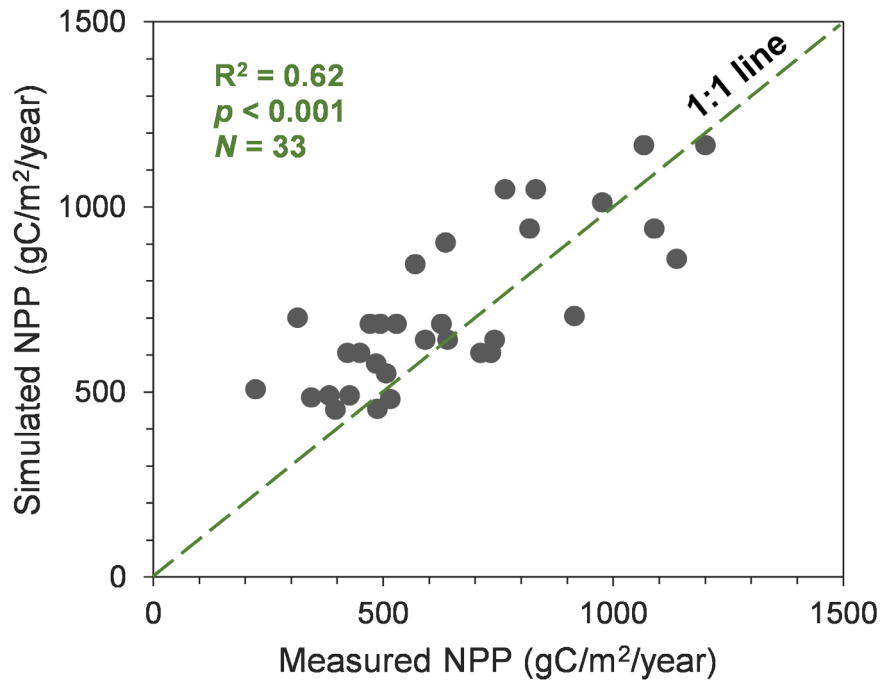

275

**Figure S8** Validation of modelled forest NPP using measured forest NPP in the Chinese subtropics

280

285

290

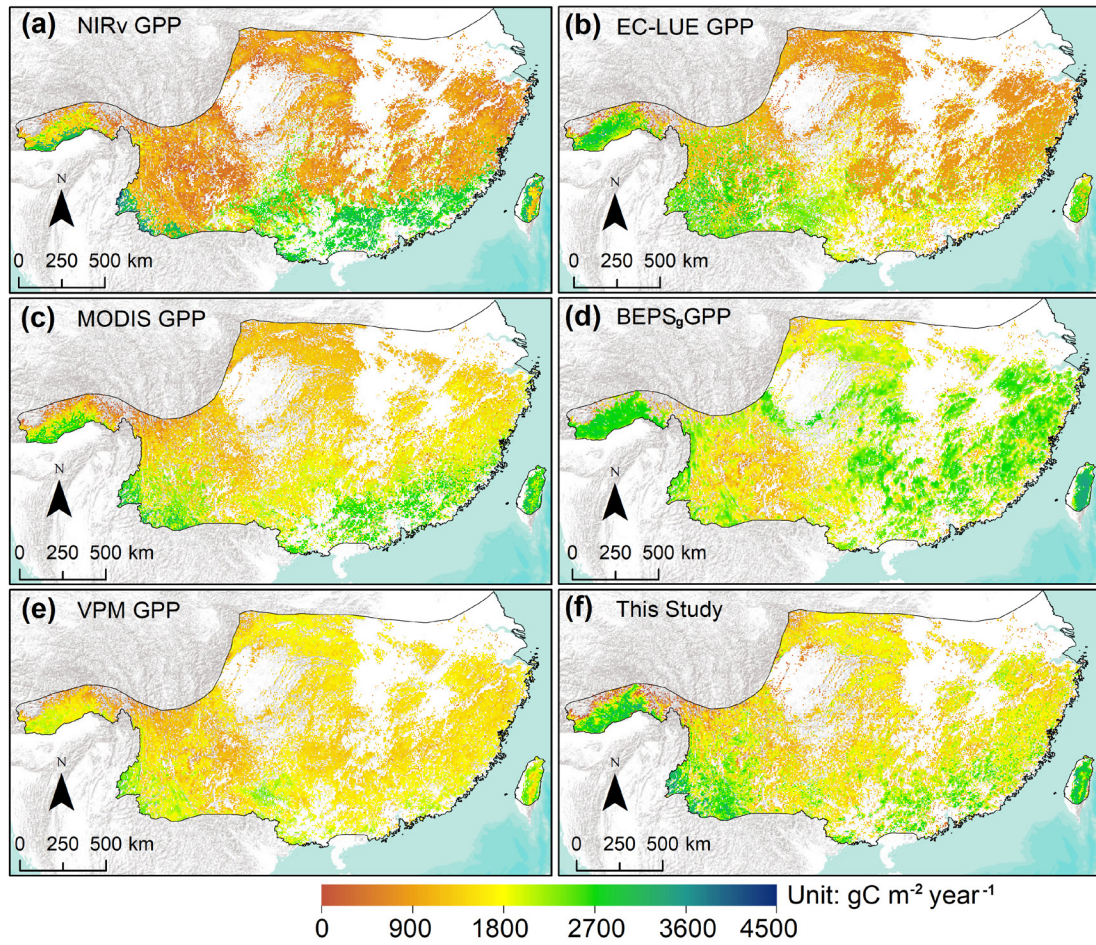

**Figure S9** Comparison of the spatial distribution of the mean annual GPP. (a) NIRv GPP, (b) EC-LUE GPP, (c) MODIS GPP, (d) another published BEPS GPP (i. e., BEPS<sub>g</sub> GPP), and (f) our simulated GPP. All the maps were calculated over the 2001–2018 period, except for VPM GPP which is only available from 2001 to 2016.

300

305

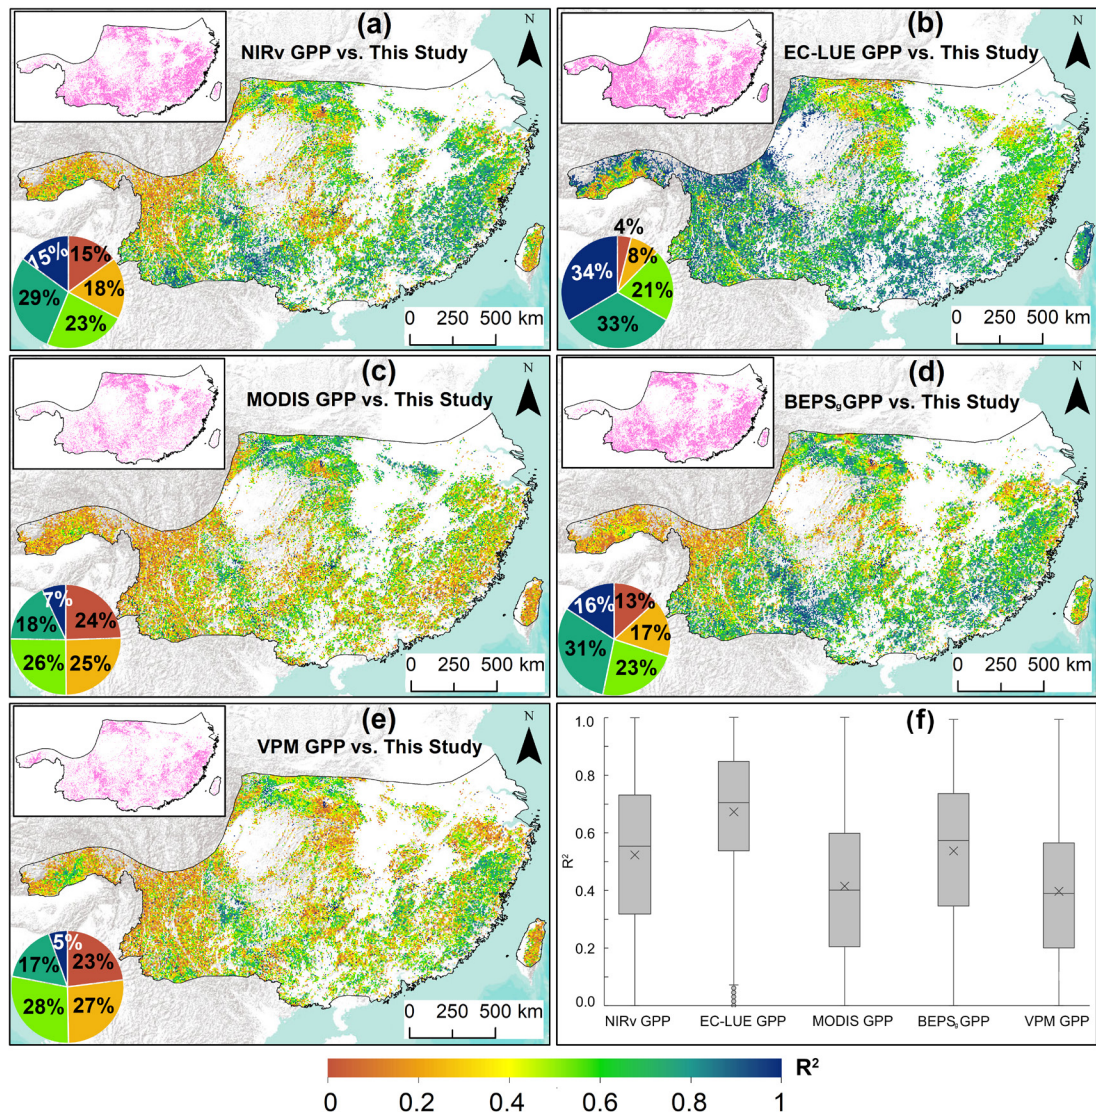

Figure S10 Spatial distribution of the determination coefficient ( $R^2$ ) between our simulated GPP and five GPP products at annual scale (a-e). The insert pie charts represent the ratios of different  $R^2$ , which corresponds to the color bar. (f) Box chart is statistical results of  $R^2$  between our simulated GPP and five GPP products. The black horizontal line in the boxplot is the median, and the cross represents the mean. Insets in (a-e) represent the subset of pixels where our simulated GPP is significantly correlated with the five GPP products at the  $P < 0.05$  confidence level.

315

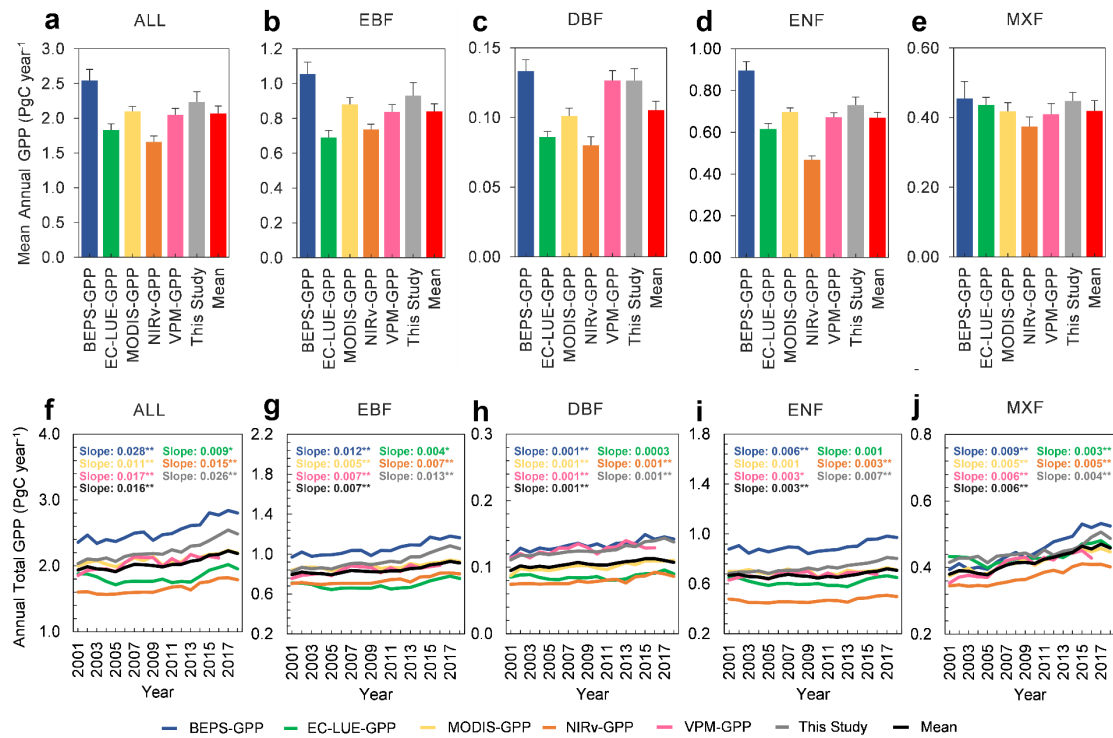

320 **Figure S11** Comparison of the multi-year mean of annual total GPP (a-e) and the annual GPP trends (f-  
 g) between our simulated GPP and other five published GPP products for the entire study area and  
 different forest types. The VPM GPP can be available from 2001 to 2016 and thus the multi-year mean  
 of annual VPM is calculated from the period 2001-2016. The grey bar in (a-e) is the standard deviation  
 (SD). The mean denotes the average of five products. EBF: evergreen needleleaf forest; DBF: deciduous  
 325 broadleaf forest; ENF: evergreen needleleaf forest; MF: mixed forest.

330

335

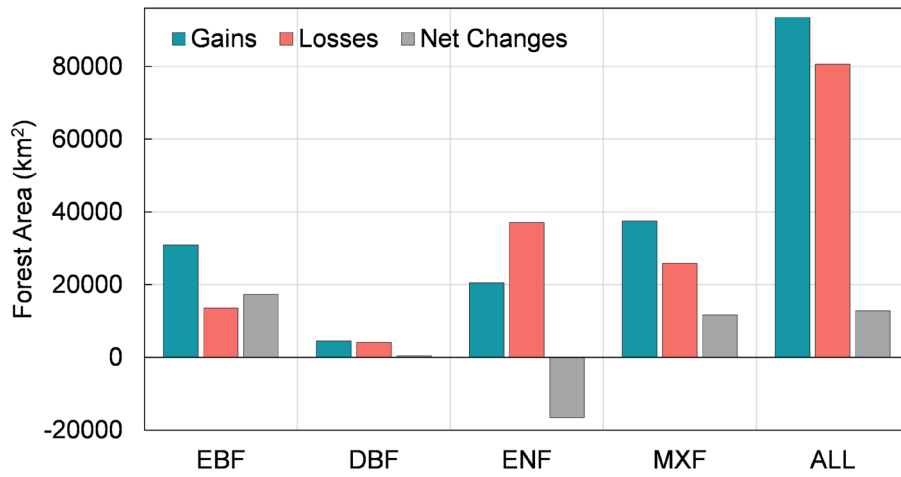

**Figure S12** Changes in forest areas between 2001 and 2018.

340

345

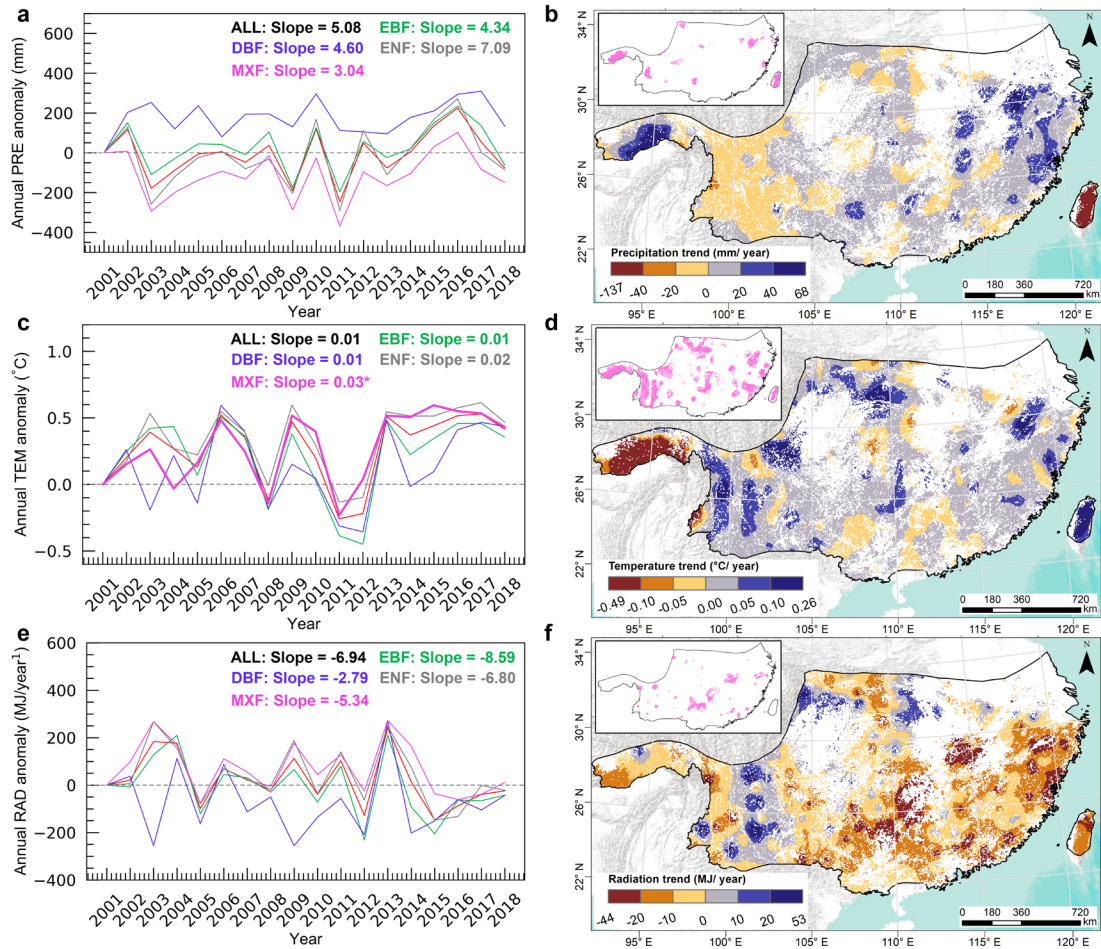

**Figure S13** Annual variations of the major climate variables on the entire forest area and different forest areas from 2001 to 2018. The left column is the temporal changes of annual total precipitation anomaly (a), annual mean temperature anomaly (c), and annual total radiation anomaly (e), respectively. The right column is the spatial distribution of annual total precipitation trends (b), annual mean temperature trends (d), and annual total radiation trends (f), respectively. The anomalies are all relative to the base year 2001. Insets in (b), (d), and (f) denote the subset of pixels with significant annual precipitation, temperature, and radiation changes at  $P < 0.05$ . White in the study area indicates non-forested areas. EBF: evergreen needleleaf forest; DBF: deciduous broadleaf forest; ENF: evergreen needleleaf forest; MF: mixed forest.

350

355

360

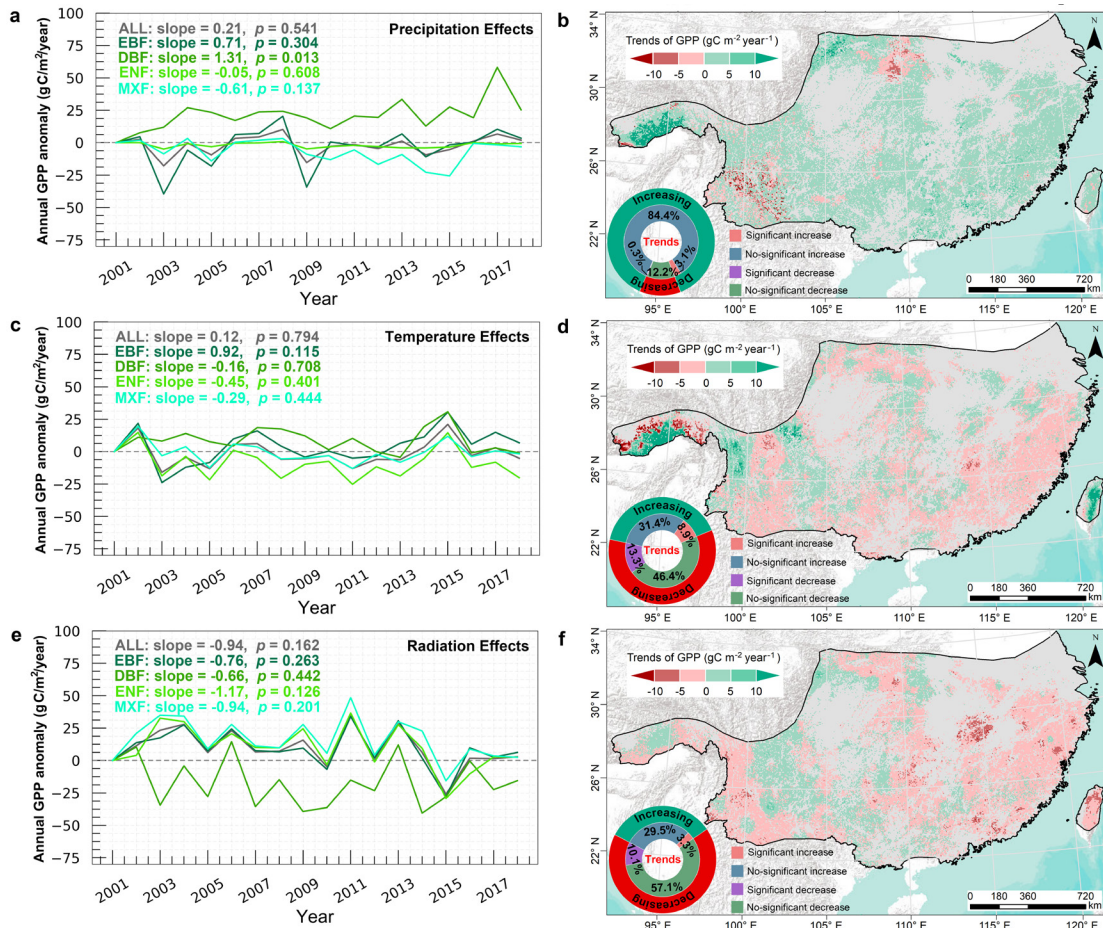

**Figure S14** Temporal variation of the effects of precipitation (a), temperature (c), solar radiation (e), and all climate changes (g) on annual GPP trends. Spatial distribution of the impacts of precipitation (b), temperature (d), solar radiation (f), and all climate changes (h) on subtropical forest GPP. Grey in the study area (i.e., b, d, f, and h) indicates non-forested areas.

**Description of Figure S14:** Simulation results showed that an increase in precipitation induced the GPP enhancement at the rate of 0.21 gC/m<sup>2</sup>/year ( $p = 0.541$ ) for all the forest types together (Fig. S14a). The negative effect of precipitation on ENF GPP (-0.05 gC/m<sup>2</sup>/year,  $p = 0.608$ ) and MXF GPP (-0.61 gC/m<sup>2</sup>/year,  $p = 0.137$ ) was mainly offset by EBF GPP (0.71 gC/m<sup>2</sup>/year,  $p = 0.304$ ) and DBF GPP (1.31 gC/m<sup>2</sup>/year,  $p = 0.013$ ) enhancements (Fig. S14a). Spatially, the positive effect of precipitation on GPP changes accounted for most parts of the total area (87.5%), of which 3.1% showed a significant ( $p < 0.05$ ) increase, mainly located in the west and north, which was consistent with the trends in the spatial distribution of precipitation (Fig. S14b). Precipitation also caused a small part of GPP (12.5%) decrease, and there is almost no significant decrease trend (Fig. S14b). Changes in temperature slightly increased the GPP across all forest types (Fig. S14c), but it showed great spatial variations (Fig. S14d). The significantly negative effect of temperature on GPP (13.3%) was mainly distributed in the south and west, while the significantly positive effect of temperature on GPP (8.9%) was mainly located in the western mountainous areas (Fig. S14d). Decreasing solar radiation (Fig. S14e) led to the negative impact of all the forest area (-0.94 gC/m<sup>2</sup>/year,  $p = 0.162$ ) as well as different forest types (EBF: -0.76 gC/m<sup>2</sup>/year,  $p = 0.263$ ; DBF: -0.66 gC/m<sup>2</sup>/year,  $p = 0.442$ ; ENF: -1.17 gC/m<sup>2</sup>/year,  $p = 0.126$ ; MXF: -0.94 gC/m<sup>2</sup>/year,



$p = 0.201$ ). The decrease in solar radiation caused a significant decrease in GPP of 10.1% ( $p < 0.05$ ) (Fig. S14f). A small portion of the study areas exhibited GPP enhancement under the influence of solar radiation, but it was hardly significant (3.3%).

385

390

395

400

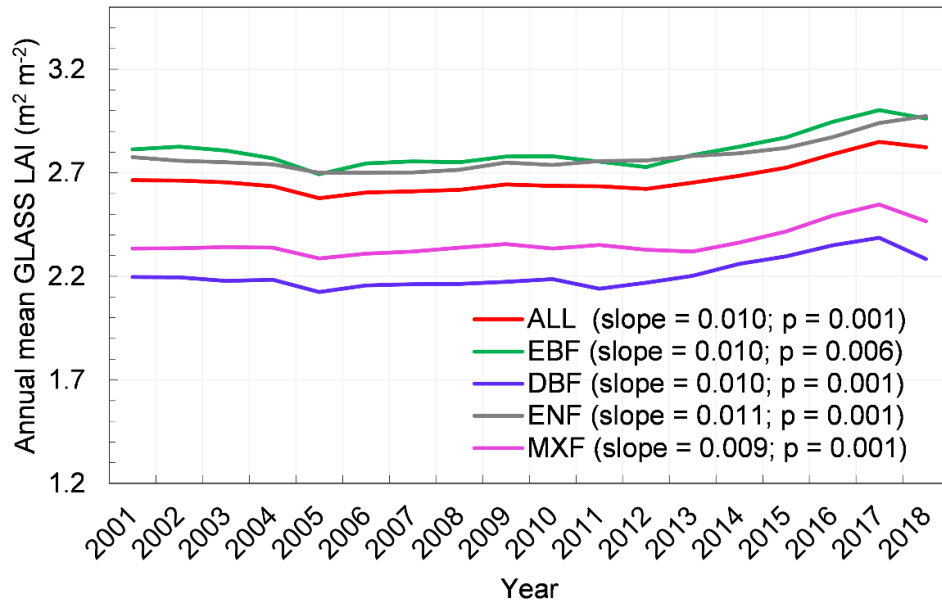

**Figure S15** Annual changes of GLASS LAI for entire forest region and different forest types. EBF: evergreen needleleaf forest; DBF: deciduous broadleaf forest; ENF: evergreen needleleaf forest; MF: mixed forest.

410

415

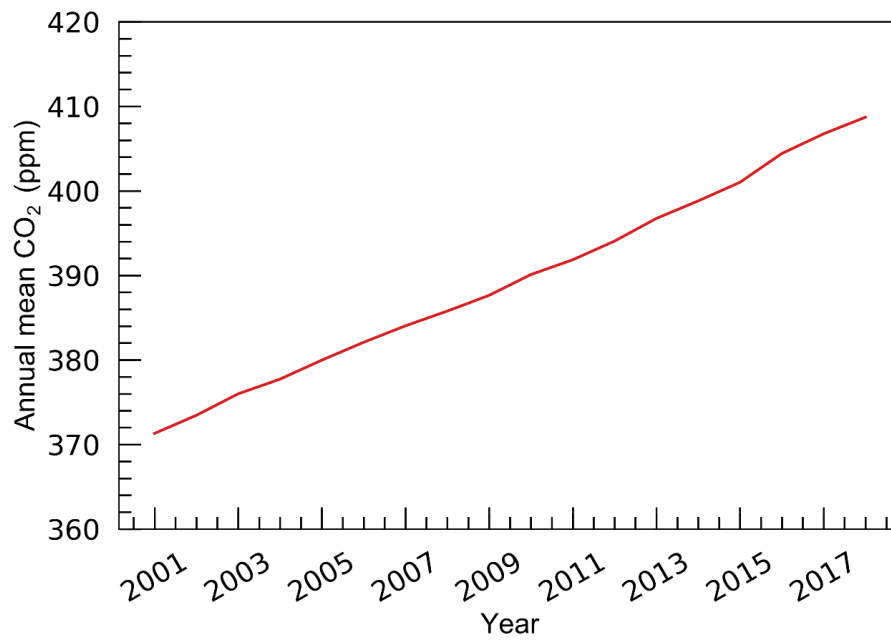

**Figure S16** Temporal changes of annual mean CO<sub>2</sub> concentration from 2001 to 2018.

420

425

430

435

## References

- Bonan, G.B., 1995. Land-atmosphere CO<sub>2</sub> exchange simulated by a land surface process model coupled to an atmospheric general circulation model *Journal of Geophysical Research*, 100(D2): 2817-2831.
- 440
- Chen, J.M., et al., 1999. Daily canopy photosynthesis model through temporal and spatial scaling for remote sensing applications. *Ecological Modelling*, 124, 99-119.
- Chen, J.M., Ju, W., Ciais, P., Viovy, N. and Lu, X., 2019. Vegetation structural change since 445 1981 significantly enhanced the terrestrial carbon sink. *Nature Communications*, 10(1): 4259.
- Fan, J.Y. et al., 2011. Research on the tree biomass and productivity of *Cryptomeria fortunei* Hooibrenk plantation. *Journal of Fujian Forestry Science and Technology*, 38, 1–5.
- 450
- Fang, X. et al., 2003. Productivity and carbon dynamics of Masson Pine plantation. *Journal of Central South Forestry University*, 23, 11–15.
- Fang, Y.T. and Mo, J.M. 2002. Study on carbon distribution and storage of a pine forest 455 ecosystem in Dinghushan Biosphere Reserve. *Guihaia*, 22, 305–310.
- Farquhar, G.D., et al., 1980. A biochemical-model of photosynthetic CO<sub>2</sub> assimilation in leaves of C-3 Species. *Planta*, 149, 78-90.
- 460
- Friedlingstein, P., et al., 2023. Global Carbon Budget 2023. *Earth System Science Data*, 15, 5301–5369.
- Han, S., 2008. Productivity estimation of the poplar plantations on the beaches in middle and 465 low reaches of Yangtze river using eddy covariance measurement. Unpublished Master Chinese Academy of Forestry, Beijing, P.R. China (in Chinese with English abstract), 75 pp.
- He, Q. et al., 2021. Drought Risk of Global Terrestrial Gross Primary Productivity Over the 470 Last 40 Years Detected by a Remote Sensing-Driven Process Model. *Journal of Geophysical Research: Biogeosciences*, 126(6): e2020JG005944.
- Geng, S., 2011. Study on the carbon flux observation over poplar plantation ecosystem of XiPing city in Henan Province of China. Unpublished Master Beijing Forestry 475 University, Beijing, P.R.China (in Chinese with English abstract), 91 pp.
- Lan, Z.J. et al., 2004. Biomass distribution of major plant communities in Jiuzhaigou valley, Sichuan. *Chinese Journal of Applied Environmental Biology*, 10, 299–306.
- Le Quere, C., 2018. Global carbon budget 2017. *Earth System Science Data*, 10, 405-448.
- 480
- Li, W.B., et al., 2007. Biomass compositions of *Pinus tabulaeformis* plantation and their relationships in the Dagou valley of the upper Minjiang River. *Journal of Mountain Science*, 25, 236–244.
- 485
- Li, Z.H. et al., 2008. Effects of stand density upon the biomass and productivity of *Eucalyptus urograndis*. *Journal of Central South Forestry University*, 28, 49–54.
- Liang, N. et al., 2007. A study on biomass in sapling stage of pure *Betula alnoides* forest and *Betula alnoides* and *Cinnamomum cassia* mixed forest. *Journal of West China Forestry*

- 490 Science, 36, 44–49.
- Liu, J., et al., 1997. A process-based boreal ecosystem productivity simulator using remote sensing inputs. *Remote Sensing Environment*, 62, 158-175.
- 495 Liu, J., Chen, J.M., Cihlar, J. and Chen, W., 1999. Net primary productivity distribution in the BOREAS region from a process model using satellite and surface data. *Journal of Geophysical Research: Atmospheres*, 104(D22): 27735-27754.
- Liu, X.C., et al., 2007. Biomass study of the plantation of *Alnus cremastogyne* Burkill at  
500 different stages of age. *Journal of Central South Forestry University*, 27, 83–86.
- Luo, J. et al., 2011. Study on biomass of different types for protection forest system area around Dongting Lake. *Hunan Forestry Science and Technology*, 38, 27–29.
- 505 Qi, D. et al., 2020. A dataset of carbon and water fluxes observation in subtropical evergreen broad-leaved forest in Ailao Shan from 2009 to 2013. *China Scientific Data*, 6(1). (2021-03-06) DOI: 10.11922/sciencedb.00186.
- Qi, L.H. et al., 2007. Species diversity and biomass allocation of vegetation restoration  
510 communities on degraded lands. *Chinese Journal of Ecology*, 26, 1697–1702.
- Qin, W.M., et al., 2011. Study on the biomass and growth law of *Paramichelia baillonii* plantation. *Journal of Fujian College of Forestry*, 31, 110–114.
- 515 Running, S.W., Mu, Q. and Zhao, M., 2015. MOD17A2H MODIS/Terra Gross Primary Productivity 8-Day L4 Global 500m SIN Grid. NASA LP DAAC. <http://doi.org/10.5067/MODIS/MOD17A2H.006>.
- Tan ZH, et al., 201. An old-growth subtropical Asian evergreen forest as a large carbon sink.  
520 *Atmospheric Environment*, 45, 1548-1554.
- Wang, S., et al., 2021. Tracking the seasonal and inter-annual variations of global gross primary production during last four decades using satellite near-infrared reflectance data. *Science of the Total Environment*, 755(Pt 2): 142569.
- 525 Xia, H.B. 2010. Biomass and net primary production in different successional stages of karst vegetation in Maolan, SW China. *Guizhou Forestry Science and Technology*, 38, 1–7.
- Xing et al., 2023. Modeling China's terrestrial ecosystem gross primary productivity with BEPS model: Parameter sensitivity analysis and model calibration. *Agricultural and Forest Meteorology*, 343, 15, 109789.
- 530 Xiong, D.G. et al., 2006. A study of annual growth and biomass of *Alnus formosana* in Yuanba District of Guangyuan City. *J. Sichuan Forestry Science and Technology*, 27, 55–58.
- 535 Yang, L.L. et al., 2008. Comparison between biomass and productivity of young *Alnus cremastogyne* Burkill plantation under different site conditions. *Journal of Central South University of Forestry & Technology*, 28, 122–126.
- 540 Yang, J. et al., 2017. Nonlinear Variations of Net Primary Productivity and Its Relationship with Climate and Vegetation Phenology, China. *Forests*, 8, 361.
- Yang, Q.P. et al., 2001. Studies on the dynamic succession of *Pinus massoniana* community in

- Heishiding Natural Reserve. *Guihaia*, 21, 295–300.
- 545 Ye, S.M.; Wen, Y.G.; Yang, M.; Liang, H.W.; Lan, J.X. Correlation analysis on productivity and plant diversity of Eucalyptus plantations under successive rotation. *Acta Bot. Boreal.-Occident. Sin.* 2010, 30, 1458–1467.
- 550 Yin, G.Q. et al., 2010. Studies on biomass of different young forests converted from farm land in Huitong, Hunan Province. *Journal of Central South University of Forestry & Technology*, 30, 9–14.
- 555 Yu, G.-R. et al., 2006. Overview of ChinaFLUX and evaluation of its eddy covariance measurement. *Agricultural and Forest Meteorology*, 137(3-4): 125-137.
- Zhang LP, 2010. Characteristics of CO<sub>2</sub> flux in a Chinese Fir Plantations Ecosystem in Huitong County, Hunan Province. Unpublished Master Central South University of Forestry and Technology, Changsha, P.R.China (in Chinese with English abstract), 61 pp.
- 560 Zhang, Y. et al., 2017. A global moderate resolution dataset of gross primary production of vegetation for 2000-2016. *Scientific Data*, 4: 170165.
- 565 Zheng, Y. et al., 2020. Improved estimate of global gross primary production for reproducing its long-term variation, 1982–2017. *Earth System Science Data*, 12(4): 2725-2746.
- Zhang, S. et al., 2018. Evaluation and improvement of the daily boreal ecosystem productivity simulator in simulating gross primary productivity at 41 flux sites across Europe. *Ecological Modelling*, 368: 205-232.
